# Supplementary material for: Mouse genome rewriting and tailoring of three important disease loci
Source: PubMed Central journal article supplement (PMC10632133; doi:10.1038/s41586-023-06675-4), 2023-11-01
Supplement: 41586_2023_6675_MOESM1_ESM.pdf [file 41586_2023_6675_MOESM1_ESM.pdf]

---

**Supplementary information**

---

**Mouse genome rewriting and tailoring of  
three important disease loci**

---

In the format provided by the  
authors and unedited

## Supplementary Information

### **Mouse genome rewriting and tailoring of three important disease loci**

Weimin Zhang, Iлона Golyner, Ran Brosh, Alvaro Fajardo, Yinan Zhu, Aleksandra M. Wudzinska, Raquel Ordoñez, André M. Ribeiro-dos-Santos, Lucia Carrau, Payal Damani-Yokota, Stephen T. Yeung, Camille Khairallah, Antonio Vela Gartner, Noor Chalhoub, Emily Huang, Hannah J. Ashe, Kamal M. Khanna, Matthew T. Maurano, Sang Yong Kim, Benjamin R. tenOever, Jef D. Boeke

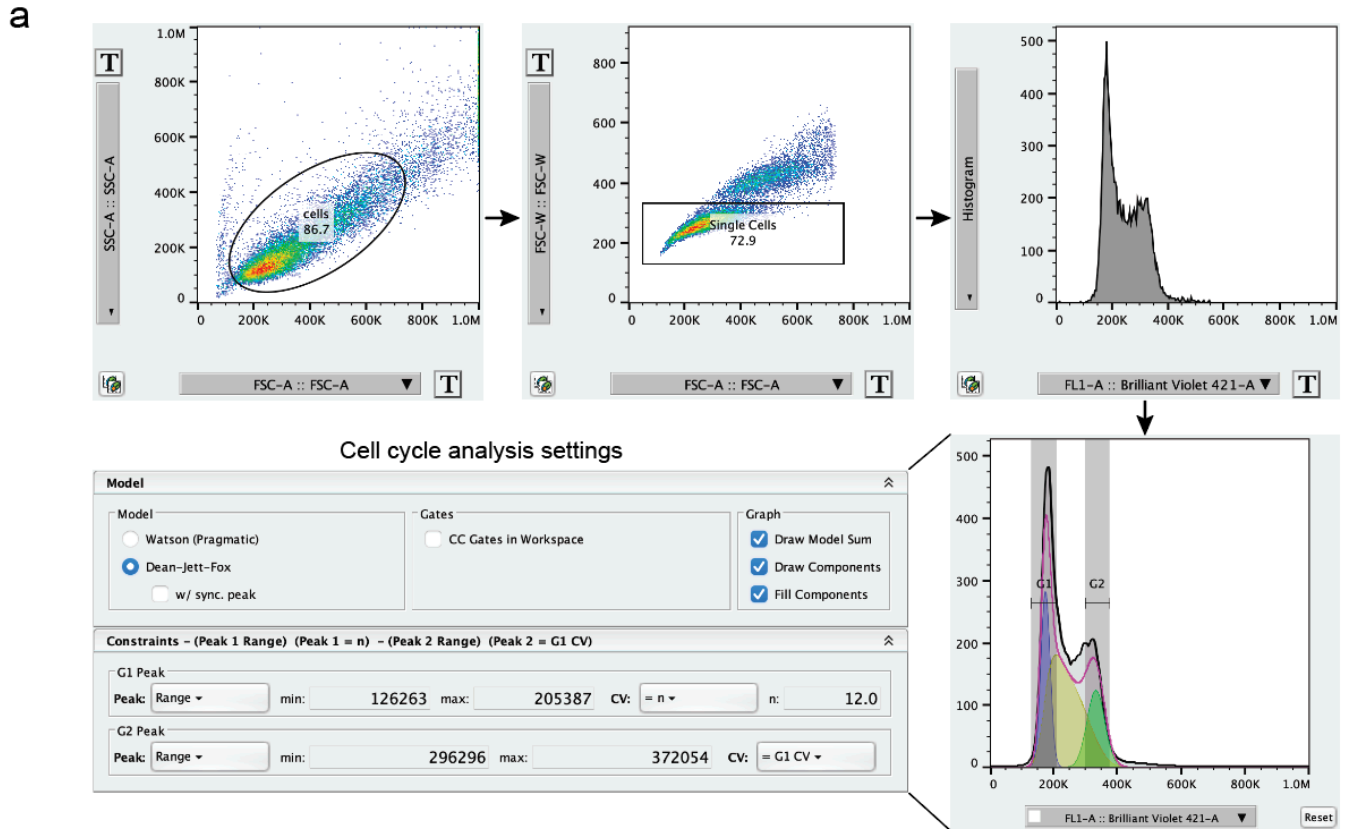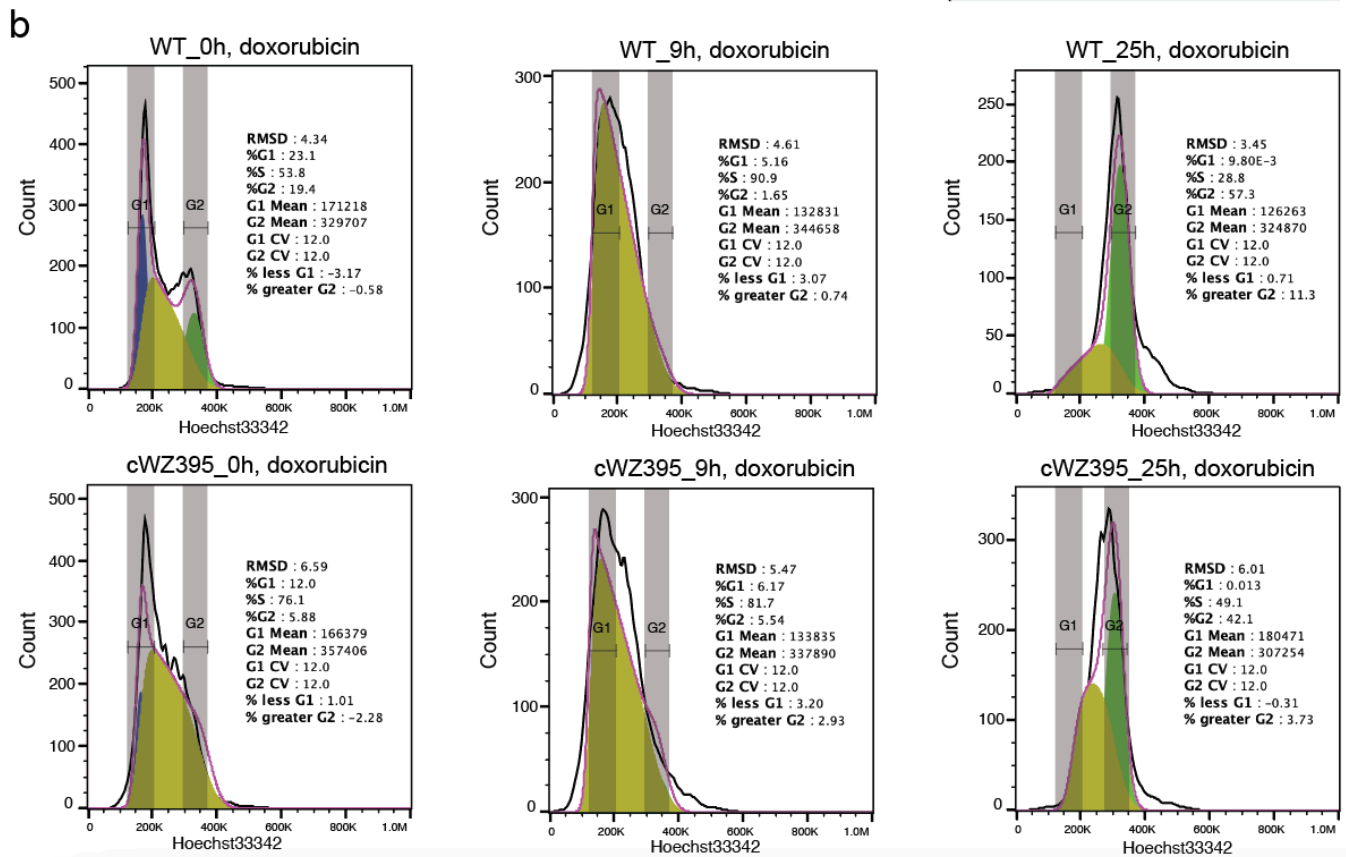

**Supplementary Figure 1. (a)** Wild type and *synTrp53* mESCs cell cycle arrest flow cytometry gating strategy. **(b).** Cell cycle analysis using FlowJo's built-in tool, wild-type *Trp53* (MK6) without doxorubicin treatment was used for defining the G1 and G2 gates.

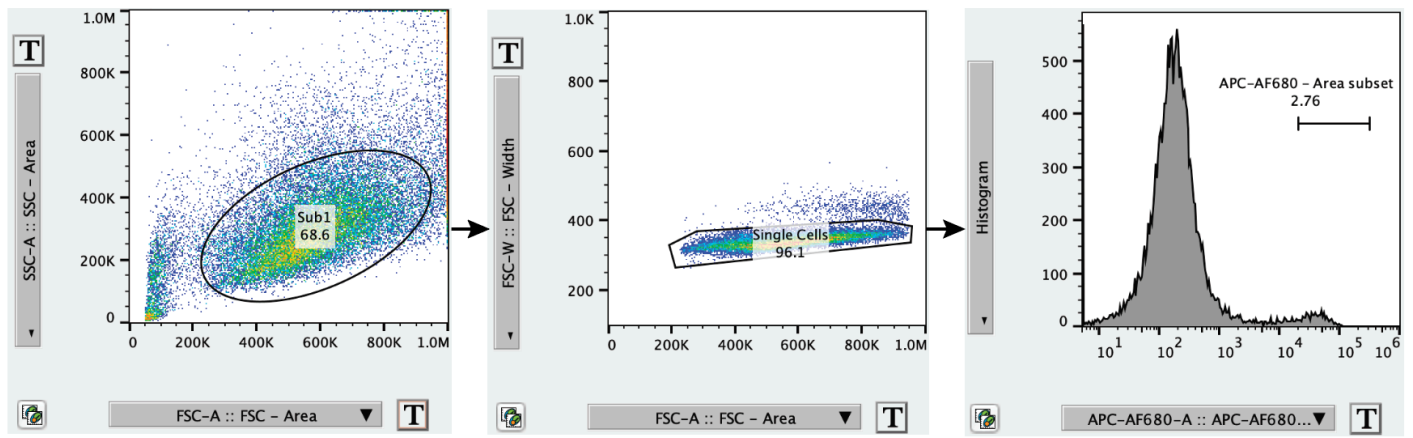

**Supplementary Figure 2.** Wild type and *synTrp53* mESCs cell apoptosis analysis flow cytometry gating strategy.

Fig. 4c. *hACE2* testis, panel 1

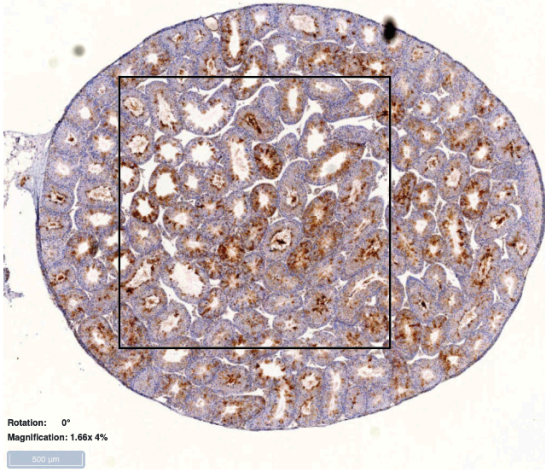

Fig. 4c. WT testis, panel 2

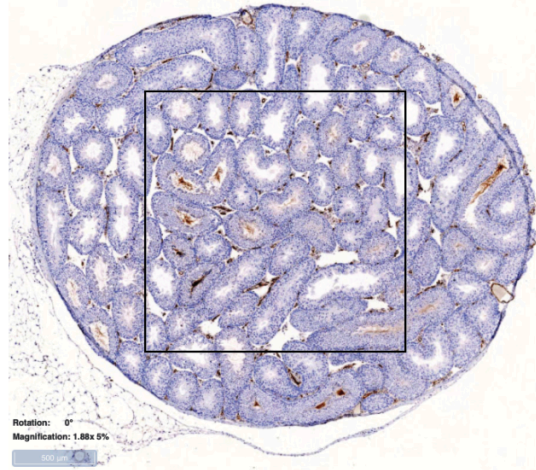

Fig. 4c. *hACE2* lung, panel 3

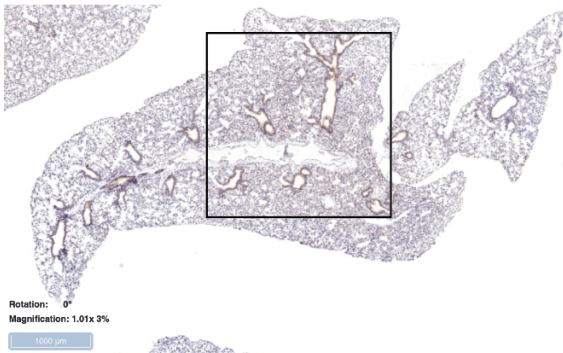

Fig. 4c. WT lung, panel 4

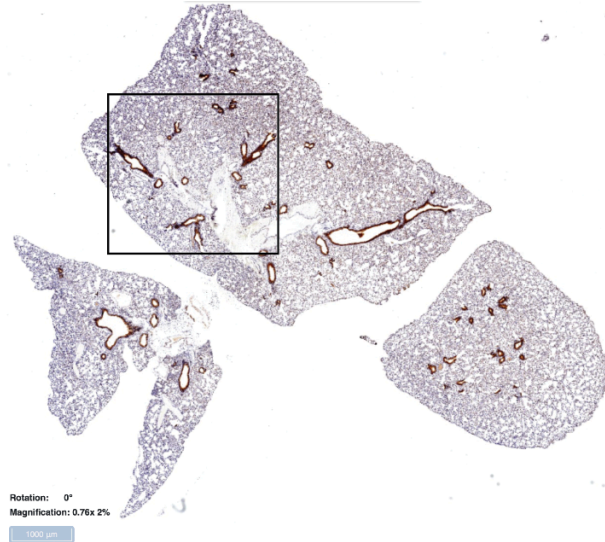

Fig. 5f. WT lung, panel 1

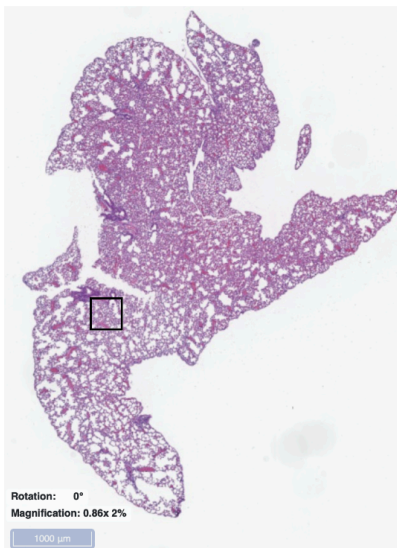

Fig. 5f. *K18-hACE2* lung, panel 2

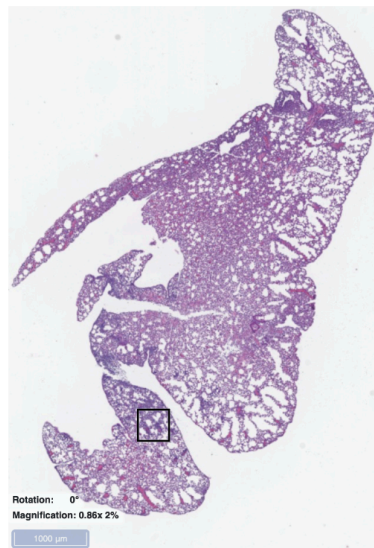

Fig. 5f. *hACE2* lung, panel 3

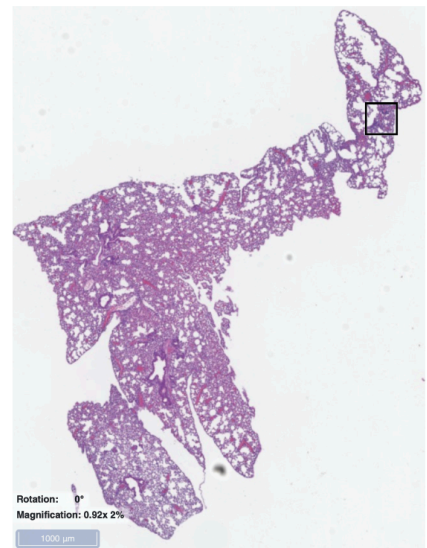

**Supplementary Figure 3.** Uncropped lungs, testes immunohistochemistry staining with ACE2 antibody, and H&E staining of infected lungs.

**Supplementary Table 1. PCRTag and insertion coordinates for the subsequent mSwAP-In of *synTrp53*.**

| Name     | Coordinates       | Inserted sequences           |
|----------|-------------------|------------------------------|
| PCRTag-1 | Chr11: 69,597,884 | GCTTTGAGCTGACAATTTGCCACCACCG |
| PCRTag-2 | Chr11: 69,611,965 | TCTGACGCCGTGGCTACTAACGGCAATA |
| PCRTag-3 | Chr11: 69,625,010 | TCTCTCCTGCCAGATGACACCTGAAGTG |
| PCRTag-4 | Chr11: 69,637,459 | CAAGGTTGACTTAAAAGCAGCTCTAGCG |
| PCRTag-5 | Chr11: 69,650,231 | CCCAAGCGTCATCATTAGCGGCAGTAAA |
| PCRTag-6 | Chr11: 69,663,762 | GTAAGCGCTTCTACGGGTGATACTTCTA |
| PCRTag-7 | Chr11: 69,676,478 | GGTGCCACTTGATAAGCTAGTTTGATCG |
| PCRTag-8 | Chr11: 69,689,789 | CGAAACCTTGAGTGGCTTGAGAATCGTC |

**Supplementary Table 2. Summary of tetraploid complementation injection success rate.**

| Tetraploid injected mESC clones             | No. of Injected Embryos | No. of Pups | Birth Rate |
|---------------------------------------------|-------------------------|-------------|------------|
| 116 kb <i>hACE2</i> -cWZ271                 | 25                      | 5           | 20%        |
| 116 kb <i>hACE2</i> -cWZ272                 | 25                      | 2           | 8%         |
| 180 kb <i>hACE2</i> -cWZ329                 | 25                      | 5           | 20%        |
| 180 kb <i>hACE2</i> -cWZ328                 | 20                      | 6           | 30%        |
| 180 kb <i>hACE2</i> -cWZ323                 | 25                      | 5           | 20%        |
| <i>TMPRSS2</i> +116 kb <i>hACE2</i> -cWZ529 | 23                      | 3           | 13%        |

**Supplementary Table 3. Guide RNA sequences.**

| Guide RNA purposes                                                           | Sequences            |
|------------------------------------------------------------------------------|----------------------|
| gRNA targets UGT1                                                            | GCUUCAUGUGGUCGGGGUAG |
| gRNA targets UGT2                                                            | CACGAGGGUGGGCCAGGGCA |
| gRNA mediates MC1 insertion for <i>ACE2</i> humanization                     | AGGGUCUUCUCUACUCAAGG |
| Custom gRNA for <i>ACE2</i> humanization                                     | UUAUUACUAGAGUAGCAGGG |
| gRNA mediates MC1 insertion for “CG-less” <i>Trp53</i> engineering           | UACUGCCGUGUAUCGUAUUG |
| Custom gRNA for <i>synTrp53</i> engineering                                  | UUGUAUAGGACCCUCGGGCA |
| Custom gRNA for engineering the 40 kb payload downstream of <i>synTrp53</i>  | CAUCUCACCAGCCUAGCAGG |
| Custom gRNA for engineering the 75 kb payload downstream of <i>synTrp53</i>  | UCAUUAACCCAGGAGCCACG |
| Custom gRNA for engineering the 115 kb payload downstream of <i>synTrp53</i> | ACCUGCUUCACAGUAACUG  |

**Supplementary Table 4. Amplicon sequencing primers.**

| Name    | Sequence                                                            | Notes                                                 |
|---------|---------------------------------------------------------------------|-------------------------------------------------------|
| oWZ1995 | CTGGAGTTCAGACGTGTGCTCTTCCGATCTNNNNN<br>NNNNNCACCATCGGAGCAGCGCTCATGG | R155R172 P7 primer with UMI                           |
| oWZ1996 | CTGGAGTTCAGACGTGTGCTCTTCCGATCTNNNNN<br>NNNNNGCGGAAATTTCTTCTTCTGTACG | R270R279 P7 primer with UMI                           |
| oWZ1997 | TTTCCCTACACGACGCTCTTCCGATCTNCACCTCC<br>AGCTGGGAGCCGTGTC             | R155R172 P5 primer for <i>Trp53<sup>wt/wt</sup></i>   |
| oWZ1998 | TTTCCCTACACGACGCTCTTCCGATCTNcTCCTGCA<br>TGGGGGGCATGAAC              | R245R246 P5 primer for <i>Trp53<sup>wt/wt</sup></i>   |
| oWZ2002 | TTTCCCTACACGACGCTCTTCCGATCTNGCTTTCTT<br>ACTGCCTTGTGCTGGT            | R270R279 P5 primer for <i>Trp53<sup>wt/wt</sup></i>   |
| oWZ2004 | CTGGAGTTCAGACGTGTGCTCTTCCGATCTNNNNN<br>NNNNNCGCGCCTTCTACCTGGAGT     | R245R246 P7 primer with UMI                           |
| oWZ2006 | TTTCCCTACACGACGCTCTTCCGATCTNNCACCTC<br>CAGCTGGGAGCCGTGTC            | R155R172 P5 primer for <i>Trp53<sup>syn/syn</sup></i> |
| oWZ2007 | TTTCCCTACACGACGCTCTTCCGATCTNcTCCTGC<br>ATGGGGGGCATGAAC              | R245R246 P5 primer <i>Trp53<sup>syn/syn</sup></i>     |
| oWZ2008 | TTTCCCTACACGACGCTCTTCCGATCTNNGCTTTCT<br>TACTGCCTTGTGCTGGT           | R270R279 P5 primer <i>Trp53<sup>syn/syn</sup></i>     |

**Supplementary Table 5. RT-qPCR primers and probes.**

| Name    | Sequence                 | Notes                                          |
|---------|--------------------------|------------------------------------------------|
| oWZ1588 | GGACCCAGGAAATGTTTCAGA    | Human <i>ACE2</i> qPCR primer F1               |
| oWZ1589 | GGCTGCAGAAAGTGACATGA     | Human <i>ACE2</i> qPCR primer R1               |
| oWZ1590 | GGGATCAGAGATCGGAAGAAGAAA | Human <i>ACE2</i> qPCR primer F2               |
| oWZ1591 | AGGAGGTCTGAACATCATCAGTG  | Human <i>ACE2</i> qPCR primer R2               |
| oWZ1592 | AAACATACTGTGACCCCGCAT    | Human <i>ACE2</i> qPCR primer F3               |
| oWZ1593 | CCAAGCCTCAGCATATTGAACA   | Human <i>ACE2</i> qPCR primer R3               |
| oWZ1596 | TCCATTGGTCTTCTGCCATCC    | Mouse <i>ACE2</i> qPCR primer F1               |
| oWZ1597 | AACGATCTCCCGCTTCATCTC    | Mouse <i>ACE2</i> qPCR primer R1               |
| oWZ1598 | TGATGAATCAGGGCTGGGATG    | Mouse <i>ACE2</i> qPCR primer F2               |
| oWZ1599 | ATTCTGAAGTCTCCGTGTCCC    | Mouse <i>ACE2</i> qPCR primer R2               |
| oWZ1600 | GATCAAGATCATTGCTCCTCCTGA | Mouse <i>Actb</i> reference primer for RT-qPCR |
| oWZ1601 | AAGGGTGTAACCGCAGCTCA     | Mouse <i>Actb</i> reference primer for RT-qPCR |

|          |                           |                                                         |
|----------|---------------------------|---------------------------------------------------------|
| oWZ1655  | AGTCCGCCTAGAAGCACTTGCGGTG | <i>Actb</i> probe labeled with Cy5                      |
| N1-F     | GACCCCAAATCAGCGAAAT       | SARS-CoV-2 nucleocapsid forward primer                  |
| N1-R     | TCTGGTACTGCCAGTTGAATCTG   | SARS-CoV-2 nucleocapsid reverse primer                  |
| N1-probe | ACCCCGCATTACGTTTGGTGGACC  | SARS-CoV-2 nucleocapsid probe labeled with FAM          |
| oWZ1683  | CCTCATTAGCTTTGTCACACGAGCC | Mouse <i>Actb</i> reference primer for copy number qPCR |
| oWZ1684  | CCATAGGACTCCCTTCTATGAGCTG | Mouse <i>Actb</i> reference primer for copy number qPCR |
| oWZ1771  | ATCGGGTGACAGAAGACCAATGGA  | <i>ACE2</i> short isoform detection primer              |
| oWZ1772  | GCTTGTGAGAGCCTTAGGTTGGATT | <i>ACE2</i> short isoform detection primer              |
| oWZ1781  | GTCAGCCAACTTTTTCCCAAGAGTG | <i>ACE2</i> long transcript variant detection primer    |
| oWZ1782  | CCGTATCAATGATGCTTCCGTCTG  | <i>ACE2</i> long transcript variant detection primer    |
| oWZ1826  | CATCCTGGTGAGGAACGAAAGG    | <i>Isg15</i> mouse RT-qPCR primer-F                     |
| oWZ1827  | CTCAGCCAGAACTGGTCTTCGT    | <i>Isg15</i> mouse RT-qPCR primer-R                     |
| oWZ1828  | CCGAGTAACGGCTGCGACAAAG    | <i>Cxcl11</i> mouse RT-qPCR primer-F                    |
| oWZ1829  | CCTGCATTATGAGGCGAGCTTG    | <i>Cxcl11</i> mouse RT-qPCR primer-R                    |
| oWZ1830  | TGGACATTGCTACCACAGAGGC    | <i>Mx1</i> mouse RT-qPCR primer-F                       |
| oWZ1831  | TTGCCTTCAGCACCTCTGTCCA    | <i>Mx1</i> mouse RT-qPCR primer-R                       |
| oWZ1855  | CCTCTAACTGGTGTGATGGCGT    | Human <i>TMPRSS2</i> RT-qPCR primer-F                   |
| oWZ1856  | TGCCAGGACTTCTCTGAGATG     | Human <i>TMPRSS2</i> RT-qPCR primer-R                   |
| oWZ1857  | AAGTCCTCAGGAGCACTGTGCA    | Mouse <i>Tmprss2</i> RT-qPCR primer-F                   |
| oWZ1858  | CAGAACCTCCAAAGCAAGACAGC   | Mouse <i>Tmprss2</i> RT-qPCR primer-R                   |
| oWZ2100  | GTGAAAGCGGGTGTGAGGAgc     | Human <i>TMPRSS2</i> isoform 1 RT-qPCR primer forward   |
| oWZ2101  | CTGTGCGGGATAGGGGTTTTcc    | Human <i>TMPRSS2</i> isoform 1 RT-qPCR primer reverse   |
| oWZ2102  | GCGAGGGGCGGGGAGCGCCg      | Human <i>TMPRSS2</i> isoform 2 RT-qPCR primer forward   |
| oWZ2103  | cgGGTAGTACTGAGCCGGATGC    | Human <i>TMPRSS2</i> isoform 2 RT-qPCR primer reverse   |
